# A Fractional Order Dengue Fever Model in the Context of Protected Travellers

E. Bonyah<sup>1</sup>, M. L. Juga<sup>2</sup>, C. W. Chukwu<sup>3</sup> and Fatmawati<sup>4\*</sup>

<sup>1</sup>*Department of Mathematics Education,  
Aktenen Appiah-Menka University of Skills Training and Entrepreneurial Development,  
Kumasi, Ghana.*

<sup>2,3</sup>*Department of Mathematics and Applied Mathematics, University of Johannesburg,  
Auckland Park Campus, Johannesburg, 2006,  
South Africa.*

<sup>4</sup>*Department of Mathematics, Faculty of Science and Technology,  
Universitas Airlangga, Surabaya 60115, Indonesia.  
Indonesia*

## Abstract

Climate changes are affecting the control of many vector-borne diseases, particularly in Africa. In this work, a dengue fever model with protected travellers is formulated. Caputo-Fabrizio operator is utilized to obtain some qualitative information about the disease. The basic properties and the reproduction number is studied. The two steady states are determined and the local stability of the states are found to be asymptotically stable. The fixed pointed theory is made use to obtain the existence and uniqueness of solutions of the model. The numerical simulation suggests that the fractional-order affects the dynamics of dengue fever.

**Keywords:** Caputo-Fabrizio, Exponential decay, Existence and uniqueness, Fixed point theory, Dengue fever.

---

\*Corresponding author: [fatmawati@fst.unair.ac.id](mailto:fatmawati@fst.unair.ac.id)

# 1 Introduction

Dengue fever is a mosquito-borne infection in the tropical and sub-tropical regions of the globe. It is caused by any of the four serotypes of the Dengue virus namely: DEN 1, DEN 2, DEN 3 and DEN 4. An estimate of about 50 million people gets infected with the disease every year in about 100 countries. [1]. Infected individuals remain asymptomatic for about 3-14 days (an average of 4-7 days) before they begin to experience a sudden onset of fever. There is no specific cure for Dengue fever disease, hospital treatments include sufficient bed rest, antipyretics, and analgesics given for supportive care. It is believed that dengue virus is quickly cleared in the human body by the natural immune system within approximately 7 days after the day of sudden onset of fever [2, 3].

Several mathematical models have been developed to understand the transmission dynamics of Dengue fever disease. Esteva and Vargas formulated an *SIR* model to analyse the dengue fever transmission dynamics with a constant human population [4] and a variable human population [5]. In [6], Edy and Supriatna developed a dengue fever transmission model which restricted the dynamics for the constant host and vector populations. Many other studies have been carried out to investigate the transmission of dengue fever, [7–11]. However, all the different modelling approaches used in these models are limited due to the local nature of integer order derivatives. Fractional calculus in recent times has attracted many researchers because of the memory effect in prediction. Mathematical modelling has become an indispensable tool in providing qualitative information on phenomena in the absence of real data. In 2015, Caputo and Fabrizio developed a novel operator namely the Caputo–Fabrizio (CF) fractional operator which involves a non-singular kernel [12]. Losada and Nieto later reported some additional properties of this operator [13]. Since then, several mathematical models have been developed by researchers using the fractional-order approach [14–18]. These models have demonstrated both the efficiency and suitability of the CF operator. We, therefore, propose a CF fractional-order system to analyse the dynamics of Dengue fever in the context of protected travellers.

The rest of the paper is organised as follows: In section 2, we give the preliminaries and define the fractional-order model in section three. In Section 4, we look at the model’s basic properties including the existence and uniqueness of solutions, equilibrium points and their stability analyses. We simulate the model in Section 5 and draw relevant conclusions from our results.

## 2 Mathematical Preliminaries

We give the following definitions that will be applied for proofs of the existence, uniqueness and positivity of the Caputo-Fabrizio (CF) model analysed in this work.

**Definition 1.** [19] Assume  $\psi(t) \in \mathcal{H}^1(\ell_1, \ell_2)$ , for  $\ell_2 > \ell_1$ ,  $p \in [0, 1]$ . Then the CF fractional operator is given as

$$\begin{aligned} D_t^p(\psi(t)) &= \frac{\mathcal{M}(p)}{(1-p)} \int_{\ell_1}^{\ell_2} \psi'(\Theta) e^{\left[-p \frac{t-\Theta}{1-p}\right]} d\Theta, \quad 0 < p < 1, \\ &= \frac{d\psi}{dt}, \quad p = 1, \end{aligned} \tag{1}$$

where  $\mathcal{M}(p)$  satisfies the condition  $\mathcal{M}(t) = \mathcal{M}(\infty) = 1$ .

**Definition 2.** The integral operator of fractional order corresponding to the CF fractional derivative defined in [13], which state

$$I_t^p(\psi(t)) = \frac{2(1-p)}{(2-p)\mathcal{M}(p)}\psi(t) + \frac{2p}{(2-p)\mathcal{M}(p)} \int_0^t \psi(\tau)d\tau, \quad t \geq 0. \quad (2)$$

**Definition 3.** The Laplace transform of  ${}^{0CF}D_t^p\psi(t)$  is represented as follows

$$L[{}^{0CF}D_t^p\psi(t)] = \mathcal{M}(p) \frac{\kappa L[-\psi(t)] - \psi(0)}{\kappa + p(1 - \kappa)}. \quad (3)$$

### 3 Fractional Dengue Fever Model Formulation

We modify the model by Olaniyi et al., [20] in which the total population is partitioned into the classes of susceptible humans  $S_b(t)$ , exposed humans  $E_b(t)$ , infectious humans  $I_b(t)$ , recovered humans  $R_b(t)$ , and the protected travellers  $V_b(t)$ . The total vector (mosquitoes) population is subdivided into susceptible mosquitoes  $S_a(t)$  and infectious mosquitoes  $I_a(t)$ . Humans and mosquitoes are recruited into their respective susceptible classes at rates  $\pi_b$  and  $\pi_a$  respectively. Protected travellers are also recruited at a rate  $\nu$ . Susceptible humans are bitten by mosquitoes at a rate  $p$  and they become infected and move into the exposed class. The probabilities that contact between a susceptible human and an infectious mosquito and between a susceptible mosquito and an infectious mosquito will result in infection are  $\beta_b$  and  $\beta_a$  respectively. Infected humans in the exposed class become infectious at a rate  $\delta_b$  and can recover from Dengue fever at a rate  $\theta$ . While in the recovered class, humans can either move into the class of protected travellers or lose their immunity and become susceptible to Dengue fever again. Individuals in all compartments die from natural causes at a rate  $\mu_b$  while mosquitoes die naturally at a rate  $\mu_a$ .

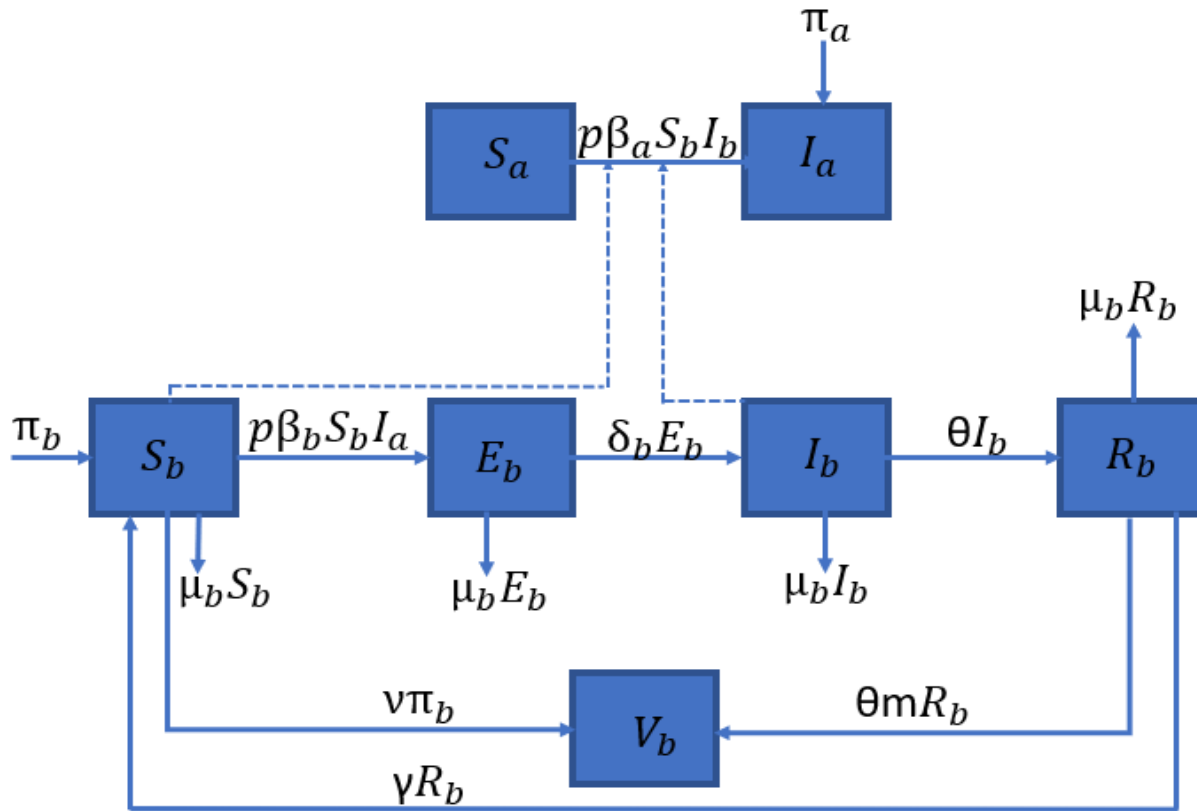

**Figure 1:** Dengue fever model flow diagram describing the disease dynamics in human population (in the context of protected travellers context) by a vector.

The model diagram 1 and together with the model assumptions gives rise to the following system:

$$\frac{dS_b}{dt} = (1 - \nu)\pi_b - p\beta_b S_b I_a - \mu_b S_b + \gamma R_b, \quad (4)$$

$$\frac{dE_b}{dt} = p\beta_b S_b I_a - (\delta_b + \mu_b) E_b, \quad (5)$$

$$\frac{dI_b}{dt} = \delta_b E_b - (\theta + \mu_b) I_b, \quad (6)$$

$$\frac{dR_b}{dt} = \theta I_b - (\gamma + m\theta + \mu_b) R_b, \quad (7)$$

$$\frac{dV_b}{dt} = \nu\pi_b + m\theta R_b - \mu_b V_b, \quad (8)$$

$$\frac{dS_a}{dt} = \pi_a - p\beta_a S_a I_b - \mu_a S_a, \quad (9)$$

$$\frac{dI_a}{dt} = p\beta_a S_a I_b - \mu_a I_a, \quad (10)$$

with initial conditions

$S_b(0) > 0, E_b(0) \geq 0, I_b(0) \geq 0, R_b(0) \geq 0, V_b(0) \geq 0, S_a(0) > 0, I_a(0) \geq 0$  for all  $t \geq 0$ .

## 4 The Caputo-Fabrizio Model Properties and Analysis

In this section, we apply the Caputo-Fabrizio derivative to the Dengue fever model (4)-(10). The fractional order model of the Dengue fever incorporating protected travellers in the Caputo sense is given by:

$${}^{CF}D_t^p S_b = (1 - \nu)\pi_b - p\beta_b S_b I_a - \mu_b S_b + \gamma R_b, \quad (11)$$

$${}^{CF}D_t^p E_b = p\beta_b S_b I_a - (\delta_b + \mu_b)E_b, \quad (12)$$

$${}^{CF}D_t^p I_b = \delta_b E_b - (\theta + \mu_b)I_b, \quad (13)$$

$${}^{CF}D_t^p R_b = \theta I_b - (\gamma + m\theta + \mu_b)R_b, \quad (14)$$

$${}^{CF}D_t^p V_b = \nu\pi_b + m\theta R_b - \mu_b V_b, \quad (15)$$

$${}^{CF}D_t^p S_a = \pi_a - p\beta_a S_a I_b - \mu_a S_a, \quad (16)$$

$${}^{CF}D_t^p I_a = p\beta_a S_a I_b - \mu_a I_a, \quad (17)$$

where  $p$  represents the fractional order,  $0 < p, 1$  and the initial conditions of the fractional order model are  $S_b(0) > 0$ ,  $E_b(0) \geq 0$ ,  $I_b(0) \geq 0$ ,  $R_b(0) \geq 0$ ,  $V_b(0) \geq 0$ ,  $S_a(0) > 0$ ,  $I_a(0) \geq 0$ , for all  $t \geq 0$ .

### 4.1 Positivity of Solutions

**Theorem 1.** *Given that  $S_b(0) > 0$ ,  $E_b(0) \geq 0$ ,  $I_b(0) \geq 0$ ,  $R_b(0) \geq 0$ ,  $V_b(0) \geq 0$ ,  $S_a(0) > 0$ ,  $I_a(0) \geq 0$ , for all  $t \geq 0$ , we show that the set  $\Omega = \{(S_b, E_b, I_b, R_b, V_b, S_a, I_a) \in \mathbb{R}_+^7\}$  attracts all positive solutions of the fractional order system (11)-(17).*

We state the following lemma used in proving Theorem 1.

**Lemma 1.** [21] *Suppose  $f(t) \in C[a, b]$  and  ${}^cD_t^p f(t) \in C[a, b]$  for all  $0 < p \leq 1$ , then we have  $f(t) + \frac{1}{\tau(p)} {}^cD_t^p f(\zeta)(t - a)^p$ , where  $a \leq \zeta \leq t$ , for all  $t \in (a, b]$ .*

From Lemma 1, we have the following remark.

**Remark 1.** *Assume that  $h(x) \in C[a, b]$  and  ${}^cD_t^p h(x) \in C[a, b]$  for  $0 < p \leq 1$ . It follows from Lemma 1 that if  ${}^cD_t^p h(x) \geq 0$ , for all  $x \in (a, b)$ , then  $h(x)$  is non decreasing and if  ${}^cD_t^p h(x) \leq 0$  for all  $x \in (a, b)$ , then  $h(x)$  is non increasing.*

We now prove Theorem 1.

*Proof.* The existence and uniqueness of the solutions of the system (11)-(17) follow from Lemma 1 and Remark 1. We now prove that  $\Omega$  is positively invariant by proving for each hyperplane bonding, the non-negative orthant of the vector field points into  $\Omega$ . From the system (11)-(17),

we have

$${}^{CF}D_t^p S_b|_{S_b} = (1 - \nu)\pi_b + \gamma R_b \geq 0, \quad (18)$$

$${}^{CF}D_t^p E_b|_{E_b} = p\beta_b S_b I_a \geq 0, \quad (19)$$

$${}^{CF}D_t^p I_b|_{I_b} = \delta_b E_b \geq 0, \quad (20)$$

$${}^{CF}D_t^p R_b|_{R_b} = \theta I_b \geq 0, \quad (21)$$

$${}^{CF}D_t^p V_b|_{V_b} = \nu\pi_b \geq 0, \quad (22)$$

$${}^{CF}D_t^p S_a|_{S_a} = \pi_a \geq 0, \quad (23)$$

$${}^{CF}D_t^p I_a|_{I_a} = p\beta_a S_a I_b \geq 0. \quad (24)$$

Therefore,  $\Omega$  is positively invariant and attracts all positive solutions of the system (11)-(17) for  $t \geq 0$ .  $\square$

## 4.2 Existence and Uniqueness of Solutions

In this subsection, we investigate the existence and uniqueness of the solution of the fractional order system (11)-(17).

Applying the Losada and Nieto integral operator as in [13] to the system (4)-(10), we obtain

$$S_b(t) - S_b(0) = 0^{CF}I_t^p \left\{ (1 - \nu)\pi_b - p\beta_b S_b I_a - \mu_b S_b + \gamma R_b \right\},$$

$$E_b(t) - E_b(0) = 0^{CF}I_t^p \left\{ p\beta_b S_b I_a - (\delta_b + \mu_b)E_b \right\},$$

$$I_b(t) - I_b(0) = 0^{CF}I_t^p \left\{ \delta_b E_b - (\theta + \mu_b)I_b \right\},$$

$$R_b(t) - R_b(0) = 0^{CF}I_t^p \left\{ \theta I_b - (\gamma + m\theta + \mu_b)R_b \right\},$$

$$V_b(t) - V_b(0) = 0^{CF}I_t^p \left\{ \nu\pi_b + m\theta R_b - \mu_b V_b \right\},$$

$$S_a(t) - S_a(0) = 0^{CF}I_t^p \left\{ \pi_a - p\beta_a S_a I_b - \mu_a S_a \right\},$$

$$I_a(t) - I_a(0) = 0^{CF}I_t^p \left\{ p\beta_a S_a I_b - \mu_a I_a \right\}.$$

By the notation in [13], we have

$$\begin{aligned}
 S_b(t) - S_b(0) &= \frac{2(1-p)}{(2-p)\mathcal{M}(p)} \left\{ (1-\nu)\pi_b - p\beta_b S_b(t)I_a(t) - \mu_b S_b(t) + \gamma R_b(t) \right\} \\
 &\quad + \frac{2p}{(2-p)\mathcal{M}(p)} \int_0^t \left\{ (1-\nu)\pi_b - p\beta_b S_b(\xi)I_a(\xi) - \mu_b S_b(\xi) + \gamma R_b(\xi) \right\} d\xi \\
 E_b(t) - E_b(0) &= \frac{2(1-p)}{(2-p)\mathcal{M}(p)} \left\{ p\beta_b S_b(t)I_a(t) - (\delta_b + \mu_b)E_b(t) \right\} \\
 &\quad + \frac{2p}{(2-p)\mathcal{M}(p)} \int_0^t \left\{ p\beta_b S_b(\xi)I_a(\xi) - (\delta_b + \mu_b)E_b(\xi) \right\} d\xi \\
 I_b(t) - I_b(0) &= \frac{2(1-p)}{(2-p)\mathcal{M}(p)} \left\{ \delta_b E_b(t) - (\theta + \mu_b)I_b(t) \right\} \\
 &\quad + \frac{2p}{(2-p)\mathcal{M}(p)} \int_0^t \left\{ \delta_b E_b(\xi) - (\theta + \mu_b)I_b(\xi) \right\} d\xi \\
 R_b(t) - R_b(0) &= \frac{2(1-p)}{(2-p)\mathcal{M}(p)} \left\{ \theta I_b(t) - (\gamma + m\theta + \mu_b)R_b(t) \right\} \\
 &\quad + \frac{2p}{(2-p)\mathcal{M}(p)} \int_0^t \left\{ \theta I_b(\xi) - (\gamma + m\theta + \mu_b)R_b(\xi) \right\} d\xi \\
 V_b(t) - V_b(0) &= \frac{2(1-p)}{(2-p)\mathcal{M}(p)} \left\{ \nu\pi_b + m\theta R_b(t) - \mu_b V_b(t) \right\} \\
 &\quad + \frac{2p}{(2-p)\mathcal{M}(p)} \int_0^t \left\{ \nu\pi_b + m\theta R_b(\xi) - \mu_b V_b(\xi) \right\} d\xi \\
 S_a(t) - S_a(0) &= \frac{2(1-p)}{(2-p)\mathcal{M}(p)} \left\{ \pi_a - p\beta_a S_a(t)I_b(t) - \mu_a S_a(t) \right\} \\
 &\quad + \frac{2p}{(2-p)\mathcal{M}(p)} \int_0^t \left\{ \pi_a - p\beta_a S_a(\xi)I_b(\xi) - \mu_a S_a(\xi) \right\} d\xi \\
 I_a(t) - I_a(0) &= \frac{2(1-p)}{(2-p)\mathcal{M}(p)} \left\{ p\beta_a S_a(t)I_b(t) - \mu_a I_a(t) \right\} \\
 &\quad + \frac{2p}{(2-p)\mathcal{M}(p)} \int_0^t \left\{ p\beta_a S_a(\xi)I_b(\xi) - \mu_a I_a(\xi) \right\} d\xi
 \end{aligned} \tag{25}$$

For the sake of simplicity, let

$$\begin{aligned}
 \Phi_1(t, S_b) &= (1-\nu)\pi_b - p\beta_b S_b I_a - \mu_b S_b + \gamma R_b, \\
 \Phi_2(t, E_b) &= p\beta_b S_b I_a - (\delta_b + \mu_b)E_b, \\
 \Phi_3(t, I_b) &= \delta_b E_b - (\theta + \mu_b)I_b, \\
 \Phi_4(t, R_b) &= \theta I_b - (\gamma + m\theta + \mu_b)R_b, \\
 \Phi_5(t, V_b) &= \nu\pi_b + m\theta R_b - \mu_b V_b, \\
 \Phi_6(t, S_a) &= \pi_a - p\beta_a S_a I_b - \mu_a S_a, \\
 \Phi_7(t, I_a) &= p\beta_a S_a I_b - \mu_a I_a.
 \end{aligned} \tag{26}$$

**Theorem 2.** *The kernels  $\Phi_1, \Phi_2, \Phi_3, \Phi_4, \Phi_5, \Phi_6$  and  $\Phi_7$  satisfy the Lipschitz condition and contraction on if the following inequality holds if*

$$0 \leq p\beta_b c_3 + \mu_b < 1.$$

*Proof.* For a function  $S_b$  and  $S_{b1}$

$$\begin{aligned}
 \|\Phi_1(t, S_b) - \Phi_1(t, S_{b1})\| &= \|(S_b - S_{b1})(p\beta_b I_a) - (S_b - S_{b1})\mu_b\|, \\
 &\leq p\beta_b I_a \|S_b - S_{b1}\| + \mu_b \|S_b - S_{b1}\| \\
 &\leq (p\beta_b I_a + \mu_b) \|S_b - S_{b1}\| \\
 &\leq (p\beta_b c_3 + \mu_b) \|S_b - S_{b1}\| \\
 &\leq d_1 \|S_b - S_{b1}\|,
 \end{aligned}$$

where  $d_1 = p\beta_b c_3 + \mu_b$ ,  $\|S_b(t)\| \leq c_1$ ,  $\|E_b(t)\| \leq c_2$ ,  $\|I_b(t)\| \leq c_3$ ,  $\|R_b(t)\| \leq c_4$ ,  $\|V_b(t)\| \leq c_5$ ,  $\|S_a(t)\| \leq c_6$  and  $\|I_a(t)\| \leq c_7$  are bounded functions. Therefore,

$$\|\Phi_1(t, S_b) - \Phi_1(t, S_{b1})\| \leq d_1 \|S_b - S_{b1}\|.$$

The Lipschitz condition is thus satisfied for  $\Phi_1$  and if  $0 \leq p\beta_b c_3 + \mu_b < 1$ , then  $\Phi$  is a contraction. Similarly we can prove that

$\Phi_2(t, E_b)$ ,  $\Phi_3(t, I_b)$ ,  $\Phi_4(t, R_b)$ ,  $\Phi_5(t, V_b)$ ,  $\Phi_6(t, S_a)$  and  $\Phi_7(t, I_a)$  satisfy the Lipschitz conditions.

$$\begin{aligned}
 \|\Phi_2(t, E_b) - \Phi_2(t, E_{b1})\| &= d_2 \|E_b(t) - E_{b1}(t)\|, \\
 \|\Phi_3(t, I_b) - \Phi_3(t, I_{b1})\| &= d_3 \|I_b(t) - I_{b1}(t)\|, \\
 \|\Phi_4(t, R_b) - \Phi_4(t, R_{b1})\| &= d_2 \|R_b(t) - R_{b1}(t)\|, \\
 \|\Phi_5(t, V_b) - \Phi_5(t, V_{b1})\| &= d_5 \|V_b(t) - V_{b1}(t)\|, \\
 \|\Phi_6(t, S_a) - \Phi_6(t, S_{a1})\| &= d_2 \|S_a(t) - S_{a1}(t)\|, \\
 \|\Phi_7(t, I_a) - \Phi_7(t, I_{a1})\| &= d_2 \|I_a(t) - I_{a1}(t)\|,
 \end{aligned}$$

where  $d_2 = (S_b + \mu_b)c_3$ ,  $d_3 = \theta + \mu_b$ ,  $d_4 = \gamma + \mu$ ,  $d_5 = \mu_b$ ,  $d_6 = p\beta_a c_3 + \mu_a$  and  $d_7 = \mu_a$ . Using



the notation in equation (2) reduces (26) to the system

$$\begin{aligned}
 S_b(t) &= S_b(0) + \frac{2(1-p)}{(2-p)\mathcal{M}(p)}\Phi_1(t, S_b) + \frac{2p}{(2-p)\mathcal{M}(p)} \int_0^t \Phi_1(\xi, S_b)d\xi, \\
 E_b(t) &= E_b(0) + \frac{2(1-p)}{(2-p)\mathcal{M}(p)}\Phi_2(t, E_b) + \frac{2p}{(2-p)\mathcal{M}(p)} \int_0^t \Phi_2(\xi, E_b)d\xi, \\
 I_b(t) &= I_b(0) + \frac{2(1-p)}{(2-p)\mathcal{M}(p)}\Phi_3(t, I_b) + \frac{2p}{(2-p)\mathcal{M}(p)} \int_0^t \Phi_3(\xi, I_b)d\xi, \\
 R_b(t) &= R_b(0) + \frac{2(1-p)}{(2-p)\mathcal{M}(p)}\Phi_4(t, R_b) + \frac{2p}{(2-p)\mathcal{M}(p)} \int_0^t \Phi_4(\xi, R_b)d\xi, \\
 V_b(t) &= V_b(0) + \frac{2(1-p)}{(2-p)\mathcal{M}(p)}\Phi_5(t, V_b) + \frac{2p}{(2-p)\mathcal{M}(p)} \int_0^t \Phi_5(\xi, V_b)d\xi, \\
 S_a(t) &= S_a(0) + \frac{2(1-p)}{(2-p)\mathcal{M}(p)}\Phi_6(t, S_a) + \frac{2p}{(2-p)\mathcal{M}(p)} \int_0^t \Phi_6(\xi, S_a)d\xi, \\
 I_a(t) &= I_a(0) + \frac{2(1-p)}{(2-p)\mathcal{M}(p)}\Phi_7(t, I_a) + \frac{2p}{(2-p)\mathcal{M}(p)} \int_0^t \Phi_7(\xi, I_a)d\xi.
 \end{aligned} \tag{27}$$

Consider the following recursive forms

$$\begin{aligned}
 S_{bn}(t) &= \frac{2(1-p)}{(2-p)\mathcal{M}(p)}\Phi_1(t, S_{b(n-1)}) + \frac{2p}{(2-p)\mathcal{M}(p)} \int_0^t \Phi_1(\xi, S_{b(n-1)})d\xi, \\
 E_{bn}(t) &= \frac{2(1-p)}{(2-p)\mathcal{M}(p)}\Phi_2(t, E_{b(n-1)}) + \frac{2p}{(2-p)\mathcal{M}(p)} \int_0^t \Phi_2(\xi, E_{b(n-1)})d\xi, \\
 I_{bn}(t) &= \frac{2(1-p)}{(2-p)\mathcal{M}(p)}\Phi_3(t, I_{b(n-1)}) + \frac{2p}{(2-p)\mathcal{M}(p)} \int_0^t \Phi_3(\xi, I_{b(n-1)})d\xi, \\
 R_{bn}(t) &= \frac{2(1-p)}{(2-p)\mathcal{M}(p)}\Phi_4(t, R_{b(n-1)}) + \frac{2p}{(2-p)\mathcal{M}(p)} \int_0^t \Phi_4(\xi, R_{b(n-1)})d\xi, \\
 V_{bn}(t) &= \frac{2(1-p)}{(2-p)\mathcal{M}(p)}\Phi_5(t, V_{b(n-1)}) + \frac{2p}{(2-p)\mathcal{M}(p)} \int_0^t \Phi_5(\xi, V_{b(n-1)})d\xi, \\
 S_{an}(t) &= \frac{2(1-p)}{(2-p)\mathcal{M}(p)}\Phi_6(t, S_{a(n-1)}) + \frac{2p}{(2-p)\mathcal{M}(p)} \int_0^t \Phi_6(\xi, S_{a(n-1)})d\xi, \\
 I_{an}(t) &= \frac{2(1-p)}{(2-p)\mathcal{M}(p)}\Phi_7(t, I_{a(n-1)}) + \frac{2p}{(2-p)\mathcal{M}(p)} \int_0^t \Phi_7(\xi, I_{a(n-1)})d\xi,
 \end{aligned} \tag{28}$$

together with the initial conditions:

$$S_{b0} = S_b(0), E_{b0} = E_b(0), I_{b0} = I_b(0), R_{b0} = R_b(0), V_{b0} = V_b(0), S_{a0} = S_a(0), I_{a0} = I_a(0).$$

The difference between the succession terms is

$$\begin{aligned} T_{1n}(t) &= S_{bn}(t) - S_{b(n-1)}(t) \\ &= \frac{2(1-p)}{(2-p)\mathcal{M}(p)} \left[ \Phi_1(t, S_{b(n-1)}) - \Phi_1(t, S_{b(n-2)}) \right] + \frac{2p}{(2-p)\mathcal{M}(p)} \int_0^t \left[ \Phi_1(\xi, S_{b(n-1)}) - \Phi_1(\xi, S_{b(n-2)}) \right] d\xi, \\ T_{2n}(t) &= E_{bn}(t) - E_{b(n-1)}(t) \\ &= \frac{2(1-p)}{(2-p)\mathcal{M}(p)} \left[ \Phi_2(t, E_{b(n-1)}) - \Phi_2(t, E_{b(n-2)}) \right] + \frac{2p}{(2-p)\mathcal{M}(p)} \int_0^t \left[ \Phi_2(\xi, E_{b(n-1)}) - \Phi_2(\xi, E_{b(n-2)}) \right] d\xi, \\ T_{3n}(t) &= I_{bn}(t) - I_{b(n-1)}(t) \\ &= \frac{2(1-p)}{(2-p)\mathcal{M}(p)} \left[ \Phi_3(t, I_{b(n-1)}) - \Phi_3(t, I_{b(n-2)}) \right] + \frac{2p}{(2-p)\mathcal{M}(p)} \int_0^t \left[ \Phi_3(\xi, I_{b(n-1)}) - \Phi_3(\xi, I_{b(n-2)}) \right] d\xi, \\ T_{4n}(t) &= R_{bn}(t) - R_{b(n-1)}(t) \\ &= \frac{2(1-p)}{(2-p)\mathcal{M}(p)} \left[ \Phi_4(t, R_{b(n-1)}) - \Phi_4(t, R_{b(n-2)}) \right] + \frac{2p}{(2-p)\mathcal{M}(p)} \int_0^t \left[ \Phi_4(\xi, R_{b(n-1)}) - \Phi_4(\xi, R_{b(n-2)}) \right] d\xi, \\ T_{5n}(t) &= V_{bn}(t) - V_{b(n-1)}(t) \\ &= \frac{2(1-p)}{(2-p)\mathcal{M}(p)} \left[ \Phi_5(t, V_{b(n-1)}) - \Phi_5(t, V_{b(n-2)}) \right] + \frac{2p}{(2-p)\mathcal{M}(p)} \int_0^t \left[ \Phi_5(\xi, V_{b(n-1)}) - \Phi_5(\xi, V_{b(n-2)}) \right] d\xi, \\ T_{6n}(t) &= S_{an}(t) - S_{a(n-1)}(t) \\ &= \frac{2(1-p)}{(2-p)\mathcal{M}(p)} \left[ \Phi_6(t, S_{a(n-1)}) - \Phi_6(t, S_{a(n-2)}) \right] + \frac{2p}{(2-p)\mathcal{M}(p)} \int_0^t \left[ \Phi_6(\xi, S_{a(n-1)}) - \Phi_6(\xi, S_{a(n-2)}) \right] d\xi, \\ T_{7n}(t) &= I_{an}(t) - I_{a(n-1)}(t) \\ &= \frac{2(1-p)}{(2-p)\mathcal{M}(p)} \left[ \Phi_7(t, I_{a(n-1)}) - \Phi_7(t, I_{a(n-2)}) \right] + \frac{2p}{(2-p)\mathcal{M}(p)} \int_0^t \left[ \Phi_7(\xi, I_{a(n-1)}) - \Phi_7(\xi, I_{a(n-2)}) \right] d\xi. \end{aligned} \tag{29}$$

Observe that

$$\begin{aligned} S_{bn}(t) &= \sum_{i=0}^n T_{1i}(t), \quad E_{bn}(t) = \sum_{i=0}^n T_{2i}(t), \quad I_{bn}(t) = \sum_{i=0}^n T_{3i}(t), \\ R_{bn}(t) &= \sum_{i=0}^n T_{4i}(t), \quad V_{bn}(t) = \sum_{i=0}^n T_{5i}(t), \quad S_{an}(t) = \sum_{i=0}^n T_{6i}(t), \quad I_{an}(t) = \sum_{i=0}^n T_{7i}(t). \end{aligned}$$

We thus have the following results

$$\begin{aligned}
 \|T_{1n}(t)\| &= \|S_{bn}(t) - S_{b(n-1)}(t)\| \\
 &= \left\| \frac{2(1-p)}{(2-p)\mathcal{M}(p)} \left[ \Phi_1(t, S_{b(n-1)}) - \Phi_1(t, S_{b(n-2)}) \right] + \frac{2p}{(2-p)\mathcal{M}(p)} \int_0^t \left[ \Phi_1(\xi, S_{b(n-1)}) - \Phi_1(\xi, S_{b(n-2)}) \right] d\xi \right\| \\
 &\leq \frac{2(1-p)}{(2-p)\mathcal{M}(p)} \left[ \Phi_1(t, S_{b(n-1)}) - \Phi_1(t, S_{b(n-2)}) \right] + \frac{2p}{(2-p)\mathcal{M}(p)} \left\| \int_0^t \left[ \Phi_1(\xi, S_{b(n-1)}) - \Phi_1(\xi, S_{b(n-2)}) \right] d\xi \right\| \\
 &\leq \frac{2(1-p)}{(2-p)\mathcal{M}(p)} d_1 \|S_{b(n-1)} - S_{b(n-2)}\| + \frac{2p}{(2-p)\mathcal{M}(p)} d_1 \int_0^t \|S_{b(n-1)} - S_{b(n-2)}\| d\xi.
 \end{aligned}$$

Thus,

$$\|T_{1n}(t)\| \leq \frac{2(1-p)}{(2-p)\mathcal{M}(p)} d_1 \|T_{1(n-1)}\| + \frac{2p}{(2-p)\mathcal{M}(p)} d_1 \int_0^t \|T_{1(n-1)}\| d\xi. \quad (30)$$

Similarly,

$$\begin{aligned}
 \|T_{2n}(t)\| &\leq \frac{2(1-p)}{(2-p)\mathcal{M}(p)} d_2 \|T_{2(n-1)}\| + \frac{2p}{(2-p)\mathcal{M}(p)} d_2 \int_0^t \|T_{2(n-1)}\| d\xi, \\
 \|T_{3n}(t)\| &\leq \frac{2(1-p)}{(2-p)\mathcal{M}(p)} d_3 \|T_{2(n-1)}\| + \frac{2p}{(2-p)\mathcal{M}(p)} d_3 \int_0^t \|T_{3(n-1)}\| d\xi, \\
 \|T_{4n}(t)\| &\leq \frac{2(1-p)}{(2-p)\mathcal{M}(p)} d_4 \|T_{2(n-1)}\| + \frac{2p}{(2-p)\mathcal{M}(p)} d_4 \int_0^t \|T_{4(n-1)}\| d\xi, \\
 \|T_{5n}(t)\| &\leq \frac{2(1-p)}{(2-p)\mathcal{M}(p)} d_5 \|T_{5(n-1)}\| + \frac{2p}{(2-p)\mathcal{M}(p)} d_5 \int_0^t \|T_{5(n-1)}\| d\xi, \\
 \|T_{6n}(t)\| &\leq \frac{2(1-p)}{(2-p)\mathcal{M}(p)} d_6 \|T_{6(n-1)}\| + \frac{2p}{(2-p)\mathcal{M}(p)} d_6 \int_0^t \|T_{6(n-1)}\| d\xi, \\
 \|T_{7n}(t)\| &\leq \frac{2(1-p)}{(2-p)\mathcal{M}(p)} d_7 \|T_{7(n-1)}\| + \frac{2p}{(2-p)\mathcal{M}(p)} d_7 \int_0^t \|T_{7(n-1)}\| d\xi.
 \end{aligned} \quad (31)$$

□

**Theorem 3.** *The fractional order system (4)-(10) has a solution if there exists to such that*

$$\frac{2(1-p)}{(2-p)\mathcal{M}(p)} d_1 + \frac{2p}{(2-p)\mathcal{M}(p)} d_1 < 1.$$

*Proof.*  $S_{bn}(t)$ ,  $E_{bn}(t)$ ,  $I_{bn}(t)$ ,  $R_{bn}(t)$ ,  $V_{bn}(t)$ ,  $S_{an}(t)$  and  $I_{an}(t)$  are all bounded functions. Using the results presented in equations (30) and (31) and the recursive algorithms, we have

$$\begin{aligned} \|T_{1n}(t)\| &\leq \|S_{bn}(0)\| \left[ \frac{2(1-p)}{(2-p)\mathcal{M}(p)}d_1 + \frac{2p}{(2-p)\mathcal{M}(p)}d_1t \right]^n, \\ \|T_{2n}(t)\| &\leq \|E_{bn}(0)\| \left[ \frac{2(1-p)}{(2-p)\mathcal{M}(p)}d_2 + \frac{2p}{(2-p)\mathcal{M}(p)}d_2t \right]^n, \\ \|T_{3n}(t)\| &\leq \|I_{bn}(0)\| \left[ \frac{2(1-p)}{(2-p)\mathcal{M}(p)}d_3 + \frac{2p}{(2-p)\mathcal{M}(p)}d_3t \right]^n, \\ \|T_{4n}(t)\| &\leq \|R_{bn}(0)\| \left[ \frac{2(1-p)}{(2-p)\mathcal{M}(p)}d_4 + \frac{2p}{(2-p)\mathcal{M}(p)}d_4t \right]^n, \\ \|T_{5n}(t)\| &\leq \|V_{bn}(0)\| \left[ \frac{2(1-p)}{(2-p)\mathcal{M}(p)}d_5 + \frac{2p}{(2-p)\mathcal{M}(p)}d_5t \right]^n, \\ \|T_{6n}(t)\| &\leq \|S_{an}(0)\| \left[ \frac{2(1-p)}{(2-p)\mathcal{M}(p)}d_6 + \frac{2p}{(2-p)\mathcal{M}(p)}d_6t \right]^n, \\ \|T_{7n}(t)\| &\leq \|I_{an}(0)\| \left[ \frac{2(1-p)}{(2-p)\mathcal{M}(p)}d_7 + \frac{2p}{(2-p)\mathcal{M}(p)}d_7t \right]^n. \end{aligned}$$

Hence, the solution of the model exists and is continuous. Next, we show that the solution is unique. Assume that the fractional model (4)-(10) has another solution  $S_b^*(t)$ ,  $E_b^*(t)$ ,  $I_b^*(t)$ ,  $R_b^*(t)$ ,  $V_b^*(t)$ ,  $S_a^*(t)$ ,  $I_a^*(t)$ , then,

$$S_b(t) - S_b^*(t) = \frac{2(1-p)}{(2-p)\mathcal{M}(p)} \left[ \Phi_1(t, S_b) - \Phi_1(t, S_b^*) \right] + \frac{2p}{(2-p)\mathcal{M}(p)} \int_0^t \left[ \Phi_1(\xi, S_b) - \Phi_1(\xi, S_b^*) \right] d\xi$$

and

$$\begin{aligned} \|S_b(t) - S_b^*(t)\| &\leq \frac{2(1-p)}{(2-p)\mathcal{M}(p)}d_1 \|S_b(t) - S_b^*(t)\| + \frac{2p}{(2-p)\mathcal{M}(p)}d_1 \|S_b(t) - S_b^*(t)\| \int_0^t d\xi \\ &= \|S_b(t) - S_b^*(t)\| \left( 1 - \frac{2(1-p)}{(2-p)\mathcal{M}(p)}d_1 - \frac{2p}{(2-p)\mathcal{M}(p)}d_1t \right) \leq 0. \end{aligned} \quad (32)$$

□

**Theorem 4.** *The fractional order model (8)-(14) has a unique solution if*

$$\left( 1 - \frac{2(1-p)}{(2-p)\mathcal{M}(p)}d_i - \frac{2p}{(2-p)\mathcal{M}(p)}d_it \right) > 0. \quad (33)$$

*Proof.* From equation (32), we have

$$\|S_b(t) - S_b^*(t)\| \left( 1 - \frac{2(1-p)}{(2-p)\mathcal{M}(p)}d_1 - \frac{2p}{(2-p)\mathcal{M}(p)}d_1t \right) \leq 0$$

and from (33)

$$\left(1 - \frac{2(1-p)}{(2-p)\mathcal{M}(p)}d_1 - \frac{2p}{(2-p)\mathcal{M}(p)}d_1t\right) > 0,$$

thus  $\|S_b(t) - S_b^*(t)\| = 0$ , hence  $S_b(t) = S_b^*(t)$ . Similarly, we establish that  $E_b(t) = E_b^*(t)$ ,  $I_b(t) = I_b^*(t)$ ,  $R_b(t) = R_b^*(t)$ ,  $V_b(t) = V_b^*(t)$ ,  $S_a(t) = S_a^*(t)$  and  $I_a(t) = I_a^*(t)$ .  $\square$

### 4.3 Model Equilibria

#### 4.3.1 The Dengue Fever Free Equilibrium Point

In the absence of a Dengue fever infected individual or mosquito, that is  $E_b^* = I_b^* = R_b^* = I_a^* = 0$ . The system (11)-(17) yields

$$S_a^* = \frac{\pi_a}{\mu_a}, \quad S_b^* = \frac{(1-\nu)\pi_b}{\mu_b} \quad \text{and} \quad V_b^* = \frac{\nu\pi_b}{\mu_b - \theta_m}.$$

Therefore, the Dengue fever free equilibrium point denoted by  $D^0$  is given by:

$$D^0 = \left( S_b^0, E_b^0, I_b^0, R_b^0, V_b^0, S_a^0, I_a^0 \right) = \left( \frac{(1-\nu)\pi_b}{\mu_b}, 0, 0, 0, \frac{\nu\pi_b}{\mu_b}, \frac{\pi_a}{\mu_a}, 0 \right).$$

Before investigating the long term dynamics of the model, we first compute the basic reproduction number in the next subsection.

#### 4.3.2 The Basic Reproduction Number

We compute the basic reproduction number  $R_D$  using the next-generation matrix method [22] as follows. Let  $\mathcal{F}$  and  $\mathcal{V}$  be the new infections and transfer matrices of the model (11)-(17) respectively. (see [22] for the definitions of  $\mathcal{F}$  and  $\mathcal{V}$ ). The corresponding Jacobian matrices evaluated at the DFE point are:

$$F = \begin{pmatrix} 0 & 0 & \frac{p\beta_b\pi_b(1-\nu)}{\mu_b} \\ 0 & 0 & 0 \\ 0 & \frac{p\beta_a\pi_a}{\mu_a} & 0 \end{pmatrix} \quad \text{and} \quad V = \begin{pmatrix} \delta_b + \mu_b & 0 & 0 \\ -\delta_b & \theta + \mu_b & 0 \\ 0 & 0 & \mu_a \end{pmatrix}.$$

The reproduction number is the spectral radius of the next generation matrix, that is  $FV^{-1}$ , so that

$$R_D = \rho(FV^{-1}) = \sqrt{\frac{\pi_a\pi_b\beta_a\beta_b(1-\nu)\delta p^2}{\mu_a^2\mu_b(\delta_b + \mu_b)(\theta + \mu_b)}}.$$

### 4.3.3 The Dengue Fever Endemic Equilibrium Point

In this subsection, we present the endemic equilibrium solution of the fractional order dengue fever model (11)-(17) denoted by

$$E^1 = (S_b^*, E_b^*, I_b^*, R_b^*, V_b^*, S_a^*, I_a^*),$$

where

$$\begin{aligned} S_a^* &= \frac{\pi_a}{p\beta_a I_b^* + \mu_a}, \quad I_a^* = \frac{p\beta_a \pi_a I_b^*}{\mu_b(p\beta_a I_b^* + \mu_a)}, \quad E_b^* = Q_1 I_b^*, \\ V_b^* &= \frac{\nu + \pi_b + m\theta(\gamma + m\theta + \mu_b)I_b^*}{\mu_b}, \quad R_b^* = Q_2 I_b^*, \quad S_b^* = \frac{Q_1 \mu_a (p\beta_a I_b^* + \mu_a)(\delta_b + \mu_b)}{p^2 \pi_a \beta_b \beta_a}, \\ I_b^* &= \frac{p^2(1 - \nu)\beta_b \beta_a \pi_a \pi_a - Q_1 \mu_a^2 \mu_b (\delta_b + \mu_b)}{p\beta_a \left( Q_1 \mu_a \mu_b (\delta_b + \mu_b) - p\beta_a \pi_a (\gamma Q_2 + Q_1 (\delta_b + \mu_b)) \right)} \end{aligned}$$

in which  $Q_1 = \frac{(\theta + \mu_b)}{\delta_b}$  and  $Q_2 = \frac{\theta}{(\gamma + m\theta + \mu_b)}$ .

## 4.4 Global Stability of the DFE

**Theorem 5.** *The DFE is globally asymptotically stable in  $\omega$  whenever  $R_D < 1$  and unstable otherwise.*

*Proof.* We consider the positive definite  $C^1$  Lyapunov function given by

$$H(t) = E_b + \kappa_1 I_b + \kappa_2 I_a$$

which consists of classes of individuals and mosquitoes who directly contribute to the disease transmission.  $\kappa_1$  and  $\kappa_2$  are non-negative constants to be determined. The CF derivative of  $H(t)$  is given by

$$\begin{aligned} {}^{CF}D_t^p H &= {}^{CF}D_t^p E_b + \kappa_1 {}^{CF}D_t^p I_b + \kappa_2 {}^{CF}D_t^p I_a \\ &= p\beta_b S_b I_a - (\delta_b + \mu_b)E_b + \kappa_1 \left[ \delta_b E_b - (\theta + \mu_b)I_b \right] + \kappa_2 \left[ p\beta_a S_a I_b - \mu_a I_a \right] \\ &= \kappa_1 S_b E_b + \left[ \kappa_2 p\beta_a S_a - (S_b + \mu_b) - \kappa_1 (\theta + \mu_b) \right] I_b + \left[ p\beta_b S_b - \kappa_2 \mu_a \right] I_a. \end{aligned}$$

At DFE,

$$S_b^* = \frac{(1 - \nu)\pi_b}{\mu_b} \quad \text{and} \quad S_a^* = \frac{\pi_a}{\mu_a}.$$

Therefore, the Lyapunov function  $H(t)$  satisfies the inequality

$${}^{CF}D_t^p H(t) \leq \frac{\kappa_1(1-\nu)\pi_b}{\mu_b} E_b + \left[ \kappa_2 p \beta_b \frac{\pi_a}{\mu_a} - (\delta_b + \mu_b) - \kappa_1(\theta + \mu_b) \right] I_b + \left[ \frac{p\beta_b(1-\nu)\pi_b}{\mu_b} - \kappa_2\mu_a \right] I_a. \quad (34)$$

We equate the coefficients of  $I_b$  and  $I_a$  to zero and solve for  $\kappa_1$  and  $\kappa_2$  so that

$$\kappa_1 = \frac{\kappa_2 p \beta_a \pi_a - \mu_a(\delta_b + \mu_b)}{\mu_a(\theta + \mu_b)}, \quad \text{and} \quad \kappa_2 = \frac{p\beta_b(1-\nu)\pi_b}{\mu_a\mu_b}.$$

Substituting the constants into the inequality (34), we obtain  $\phi(R_D^2 - 1)E_b$  where  $\phi = (\delta_b + \mu_b)(1 - \nu)\pi_b$ . When  $R_D \leq 1$ ,  ${}^{CF}D_t^p H(t)$  is negative semi definite with equality at  $R_D = 1$ , and  $E_b \in E^0$ . Therefore,  $\{E^0\}$  is the largest compact invariant set in  $\Omega$ . Thus, by LaSalle's invariant principle [23], the DFE is globally asymptotically stable in  $\Omega$  if  $R_D \leq 1$  and unstable otherwise.  $\square$

## 5 Numerical Simulations and Discussion

Here, we carry out numerical simulation of the dengue fever model based on the Caputo-Fabrizio operator. The Adams–Bashforth scheme as in [24] is employed in solving (11)-(17). The step size for the numerical simulations is 0.001 with time interval of [0,120]. The numerical simulation is based on the following parameter values.

$$\pi_b = 0.05, \quad \pi_a = 0.071, \quad \beta_b = 0.5, \quad \beta_a = 0.4, \quad \delta_b = 0.03, \quad \theta = 0.02, \quad p = 0.4,$$

$$\rho = 0.5, \quad \nu = 0.00011, \quad m = 0.06, \quad \mu_b = 0.0000548, \quad \mu_a = 0.067.$$

Figure 2(a) is the susceptible humans and as the fractional order is increased from 0.75 to 1 the number of susceptible humans' decrease. As more humans move into the exposed class the susceptible population is expected to reduce in reality. In Figure 2(b) the number of exposed humans increase as the fractional order rise towards one. It can be inferred that as the number of exposed humans increase, the fractional-order also moves up. One major characteristic of exponential law is its crossover ability which ensures a better prediction. Thus the operator can stretch from one operator to another. Similarly, in Figure 2(c) as the fractional order increases, the number of humans infected with dengue fever go up. Naturally, this is expected in a typical epidemiological model. Figure 2(d) is the recovered humans but as the fractional order increases, the number of recovered humans also decrease. Therefore, one can say that, to reverse the situation in the community, efforts must be made to reduce the fractional-order so that more humans can recover. Thus, there should be more efforts towards treatment and boosting the immunity of the infected humans. In Figure 3(a) the number of protected travellers increase as the fractional order also increases. This means that effort must be made to push up the fractional-order to have as many protected travellers as possible. Figure 3(b) depicts the number of susceptible mosquitoes in the communities and as the fractional order increases the number of susceptible individuals decrease. This is naturally expected in an epidemiological model because they move to the infected compartment as more get infected. Figure 3(c) is the infectious mosquitoes and as the fractional order increases the number of infectious mosquitoes

also go up. For the infectious mosquitoes to be minimized effort must be made to reduce the fractional order.

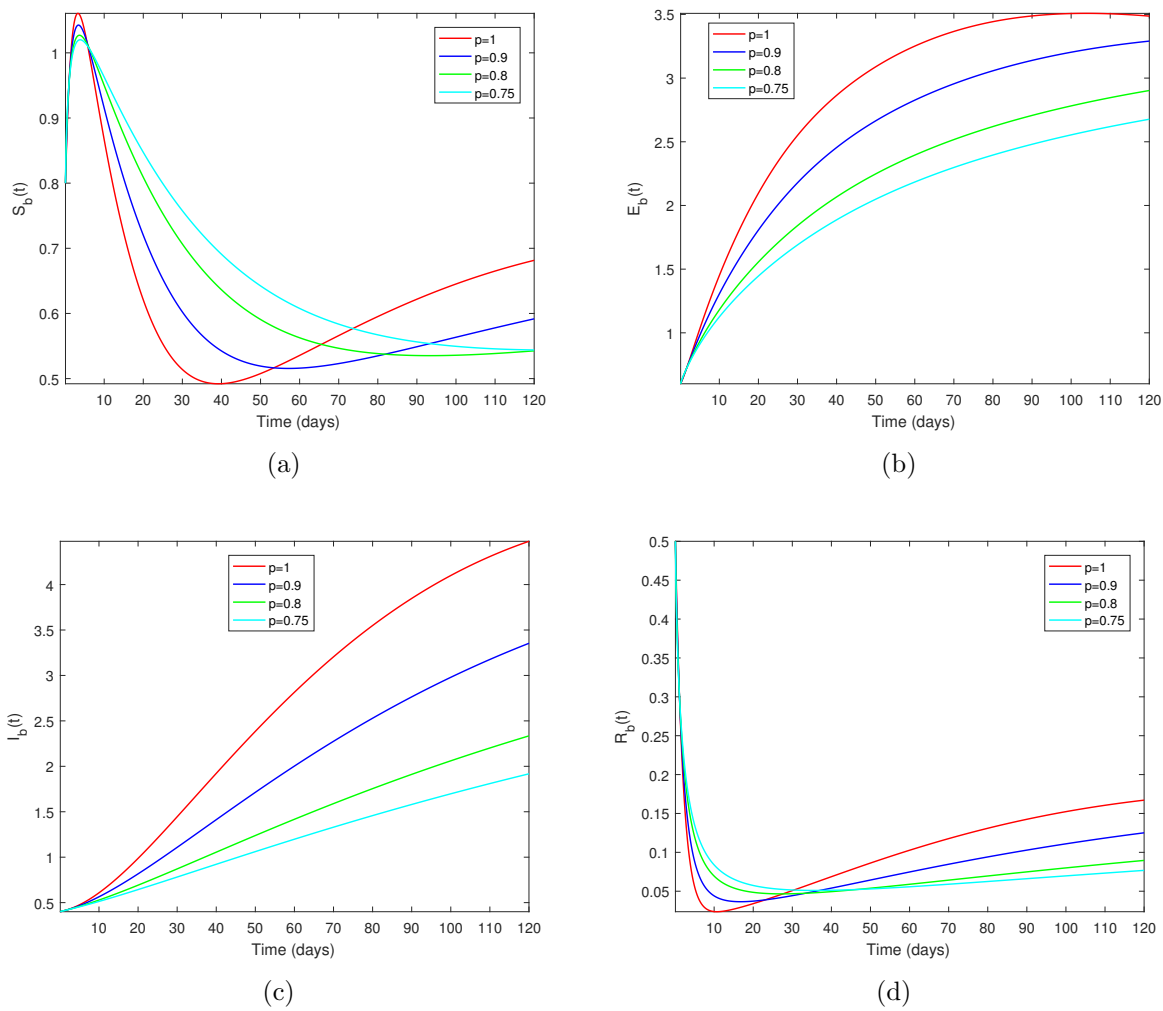

**Figure 2:** Simulations for Dengue fever model (11)-(17) via Exponential-law at  $p = 1, 0.9, 0.8, 0.75$ .



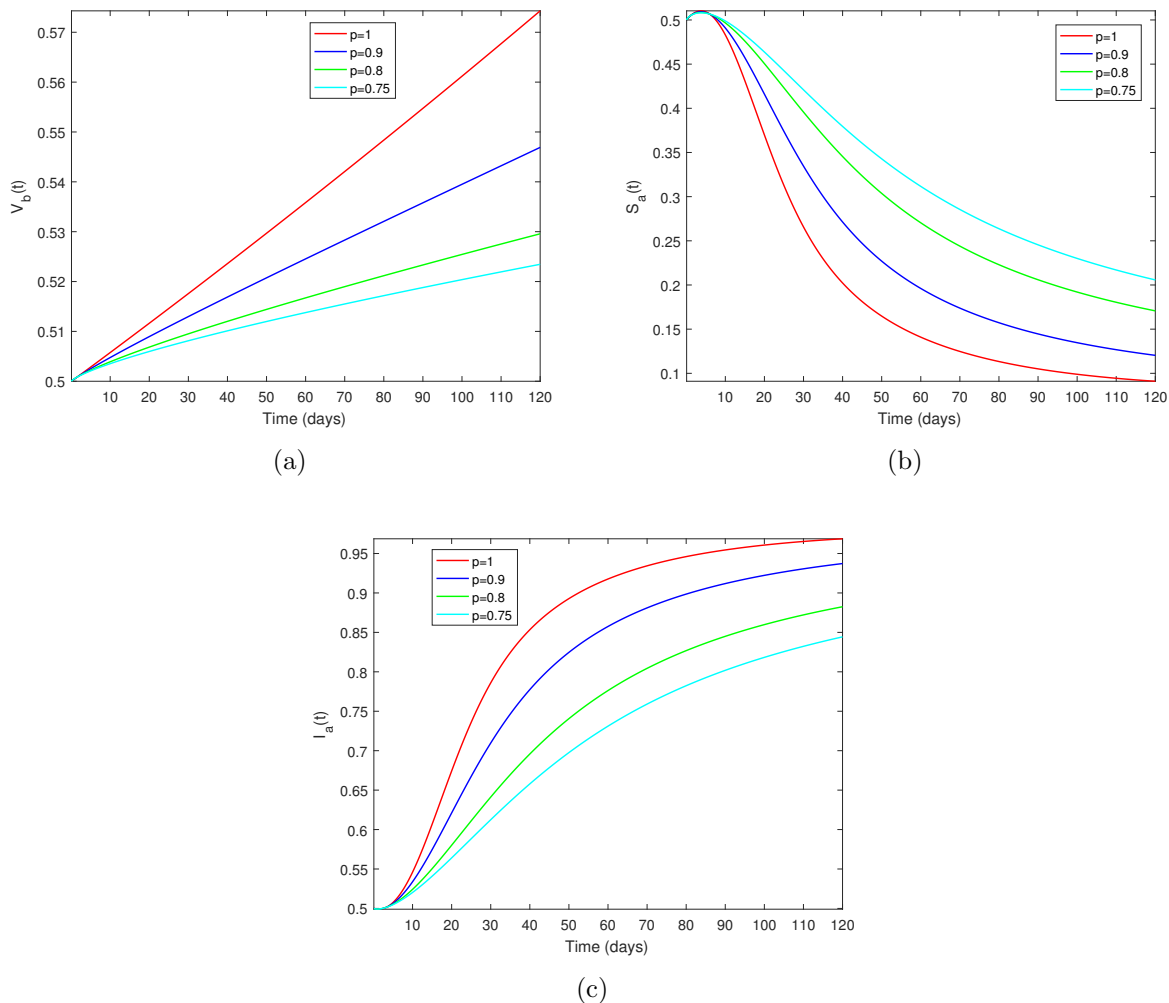

**Figure 3:** Simulations for Dengue fever model (11)-(17) via Exponential-law at  $p = 1, 0.9, 0.8, 0.75$ .

## 6 Conclusion

In this paper, the dengue fever model with travellers' protection was formulated and analysed. Fractional derivatives based on the exponential decay law approach was utilized for the analysis. The basic properties of the model have been investigated as well as the steady states. The stability analysis of the dengue fever model was examined and found to be globally stable at the disease free state. Fixed point theory was employed to determine the existence and uniqueness of solutions of the dengue fever model. The numerical simulation result shows that fractional-order affects the dynamics of the dengue fever model. In conclusion, complex biological models can be explored using the exponential law.

## Conflict of Interests:

The authors declare that there is no conflict of interests regarding the publication of this paper.

## Acknowledgements

Authors will like to say thanks to their respective Universities for the production of this manuscript.

## Funding:

No funding used for this research work.

## References

- [1] Organization WH. UNICEF/UNDP/World Bank/WHO Special Programme for Research and Training in Tropical Diseases. Making health research work for poor people : progress 2003-2004 : seventeenth programme report / Tropical Disease Research. World Health Organization; 2005. Available from: <https://apps.who.int/iris/handle/10665/69139>.
- [2] Organization PAH. Dengue and dengue hemorrhagic fever in the Americas: Guidelines for prevention and control. Scientific Publication No. 548, Pan American Health Organization; 1994. Available from: <http://www.paho.org/English/hcp/hct/vbd/arias-dengue.htm><https://iris.paho.org/handle/10665.2/40300>.
- [3] Vaughn DW, KSIBNSSSETRBRAEFNA Green S. Dengue viremia titer, antibody response pattern, and virus serotype correlate with disease severity. *J Infect Dis.* 2000;181(1):2–9.
- [4] Esteva L, VC. Analysis of a dengue disease transmission model. *Mathematical Biosciences.* 1998;150(2):131–151.
- [5] Esteva L, Vargas C. A model for dengue disease with variable human population. *Journal of mathematical biology.* 1999;38(3):220–240.
- [6] Soewono E, Supriatna AK. A two-dimensional model for the transmission of dengue fever disease. *Bulletin of the Malaysian Mathematical Sciences Society.* 2001;24(1).
- [7] Pongsumpun P. Mathematical model of dengue disease with the incubation period of virus. *World Academy of Science, Engineering and Technology.* 2008;44:328–332.
- [8] Pinho STRd, Ferreira CP, Esteva L, Barreto FR, Morato e Silva V, Teixeira M. Modelling the dynamics of dengue real epidemics. *Philosophical Transactions of the Royal Society A: Mathematical, Physical and Engineering Sciences.* 2010;368(1933):5679–5693.
- [9] Kongnuy R, Pongsumpun P. Mathematical modeling for dengue transmission with the effect of season. *International Journal of Biological and life sciences.* 2011;7(3).
- [10] Side S, Noorani MSM. A SIR model for spread of dengue fever disease (simulation for South Sulawesi, Indonesia and Selangor, Malaysia). *World Journal of Modelling and Simulation.* 2013;9(2):96–105.
- [11] Gakkhar S, Chavda NC. Impact of awareness on the spread of dengue infection in human population. 2013.
- [12] Caputo M, Fabrizio M. A new definition of fractional derivative without singular kernel. *Progr Fract Differ Appl.* 2015;1(2):1–13.

- [13] Losada J, Nieto JJ. Properties of a new fractional derivative without singular kernel. *Progr Fract Differ Appl.* 2015;1(2):87–92.
- [14] Singh J, Kumar D, Hammouch Z, Atangana A. A fractional epidemiological model for computer viruses pertaining to a new fractional derivative. *Applied Mathematics and Computation.* 2018;316:504–515.
- [15] Singh J, Kumar D, Al Qurashi M, Baleanu D. A new fractional model for giving up smoking dynamics, *Adv. Difference Equ.* 2017;2017:16.
- [16] Djida JD, Atangana A. More generalized groundwater model with space-time caputo Fabrizio fractional differentiation. *Numerical Methods for Partial Differential Equations.* 2017;33(5):1616–1627.
- [17] Kumar D, Singh J, Baleanu D, Rathore S. Analysis of a fractional model of the Ambartsumian equation. *The European Physical Journal Plus.* 2018;133(7):259.
- [18] Kumar D, Singh J, Baleanu D. A fractional model of convective radial fins with temperature-dependent thermal conductivity. *Rom Rep Phys.* 2017;69(1):103.
- [19] Caputo M, Fabrizio M. A new definition of fractional derivative without singular kernel. *Progr Fract Differ Appl.* 2015;1(2):1–13.
- [20] Olaniyi S, Okosun K, Adesanya S, Lebelo R. Modelling malaria dynamics with partial immunity and protected travellers: optimal control and cost-effectiveness analysis. *Journal of Biological Dynamics.* 2020;14(1):90–115.
- [21] Odibat ZM, Shawagfeh NT. Generalized Taylor’s formula. *Applied Mathematics and Computation.* 2007;186(1):286–293.
- [22] Mukandavire Z, Tripathi A, Chiyaka C, Musuka G, Nyabadza F, Mwambi H. Modelling and analysis of the intrinsic dynamics of cholera. *Differential Equations and Dynamical Systems.* 2011;19(3):253–265.
- [23] La Salle J, Lefschetz S, Alverson R. Stability by Liapunov’s direct method with applications. *PhT.* 1962;15(10):59.
- [24] Owolabi KM, Atangana A. Analysis and application of new fractional Adams–Bashforth scheme with Caputo–Fabrizio derivative. *Chaos, Solitons & Fractals.* 2017;105:111–119.
